# Supplementary material for: Scandinavium goeteborgense gen. nov., sp. nov., a New Member of the Family Enterobacteriaceae Isolated From a Wound Infection, Carries a Novel Quinolone Resistance Gene Variant
Source: PubMed Central journal article supplement (PMC6856666; doi:10.3389/fmicb.2019.02511), 2019-11-05
Supplement: Table_2.pdf [file Table_2.pdf]

**Table S2.** Assembly statistics for the whole genome sequence of strain CCUG 66741<sup>T</sup> and the other type strains of the family *Enterobacteriaceae* sequenced in the present study.

| <b>Strain</b>                                             | <b>Accession number</b> | <b>Ion<br/>Torrent<br/>platform</b> | <b>Coverage</b> | <b>No. of<br/>contigs</b> | <b>G+C<br/>(%)</b> | <b>N<sub>50</sub><br/>(bp)</b> | <b>Total length<br/>(bp)</b> | <b>No. of<br/>CDS<sup>a</sup></b> |
|-----------------------------------------------------------|-------------------------|-------------------------------------|-----------------|---------------------------|--------------------|--------------------------------|------------------------------|-----------------------------------|
| <i>Scandinavium goeteborgense</i> CCUG 66741 <sup>T</sup> | LYLP00000000            | PGM                                 | 43x             | 192                       | 54.31              | 74,823                         | 4,539,908                    | 4,384                             |
| <i>Lelliottia nimipressuralis</i> CCUG 25894 <sup>T</sup> | SDDX00000000            | S5                                  | 36x             | 67                        | 54.85              | 236,780                        | 4,616,251                    | 4,446                             |
| <i>Buttiauxella izardii</i> CCUG 35510 <sup>T</sup>       | QZWH00000000            | S5                                  | 280x            | 91                        | 51.26              | 91,315                         | 4,769,981                    | 4,389                             |

<sup>a</sup> CDS, coding sequences.
