# Supplementary material for: Scandinavium goeteborgense gen. nov., sp. nov., a New Member of the Family Enterobacteriaceae Isolated From a Wound Infection, Carries a Novel Quinolone Resistance Gene Variant
Source: PubMed Central journal article supplement (PMC6856666; doi:10.3389/fmicb.2019.02511), 2019-11-05
Supplement: Table_3.pdf [file Table_3.pdf]

**Table S3.** Sequence similarity values of the complete 16S rRNA gene sequence (1,552 bp) of strain CCUG 66741<sup>T</sup> with type strains, using the ‘Identify’ engine of EzBioCloud and ANIb and *in silico* DNA-DNA hybridization (DDH) values between the genome sequence of strain CCUG 66741<sup>T</sup> and the genome sequences of the type strains showing 16S rRNA gene sequence similarity values  $\geq 98.7\%$  (shaded in green). Species with 16S rRNA gene sequence similarity  $< 98.7\%$  are shaded in red.

| Type strain                                              | 16S rRNA gene sequence similarity (%) | <i>In silico</i> DDH (%) | ANIb (%) | GenBank accession number |
|----------------------------------------------------------|---------------------------------------|--------------------------|----------|--------------------------|
| <i>Leclercia adecarboxylata</i> NBRC 102595 <sup>T</sup> | 98.8                                  | 22.2                     | 78.31    | JMPM000000000            |
| <i>Enterobacter ludwigii</i> EN-119 <sup>T</sup>         | 98.8                                  | 22.0                     | 78.20    | CP017279                 |
| <i>Enterobacter roggkampii</i> EN-117 <sup>T</sup>       | 98.8                                  | 22.5                     | 78.66    | CP017184                 |
| <i>Pantoea rodasii</i> LMG 26273 <sup>T</sup>            | 98.8                                  | 19.8                     | 72.57    | PIQI000000000            |
| <i>Buttiauxella izardii</i> DSM 9397 <sup>T</sup>        | 98.7                                  | 20.5                     | 75.61    | QZWH000000000            |
| <i>Citrobacter freundii</i> DSM 30039 <sup>T</sup>       | 98.6                                  | n/a                      | n/a      | n/a                      |
| <i>Buttiauxella agrestis</i> ATCC 33320 <sup>T</sup>     | 98.6                                  | n/a                      | n/a      | n/a                      |
| <i>Enterobacter cancerogenus</i> ATCC 33241 <sup>T</sup> | 98.6                                  | n/a                      | n/a      | n/a                      |
| <i>Buttiauxella noackiae</i> ATCC 51607 <sup>T</sup>     | 98.6                                  | n/a                      | n/a      | n/a                      |
| <i>Buttiauxella ferragutiae</i> ATCC 51602 <sup>T</sup>  | 98.6                                  | n/a                      | n/a      | n/a                      |
| <i>Buttiauxella gaviniae</i> ATCC 51604 <sup>T</sup>     | 98.6                                  | n/a                      | n/a      | n/a                      |
| <i>Klebsiella aerogenes</i> KCTC 2190 <sup>T</sup>       | 98.6                                  | n/a                      | n/a      | n/a                      |
| <i>Enterobacter asburiae</i> JCM 6051 <sup>T</sup>       | 98.6                                  | n/a                      | n/a      | n/a                      |
| <i>Lelliottia amnigena</i> NBRC 105700 <sup>T</sup>      | 98.6                                  | n/a                      | n/a      | n/a                      |
| <i>Enterobacter chuandaensis</i> 090028                  | 98.6                                  | n/a                      | n/a      | n/a                      |
| <i>Enterobacter huaxiensis</i> 090008 <sup>T</sup>       | 98.5                                  | n/a                      | n/a      | n/a                      |
| <i>Kluyvera cryocrescens</i> ATCC 33435 <sup>T</sup>     | 98.5                                  | n/a                      | n/a      | n/a                      |
| <i>Erwinia aphidicola</i> DSM 19347 <sup>T</sup>         | 98.5                                  | n/a                      | n/a      | n/a                      |
| <i>Citrobacter werkmanii</i> NBRC 105721 <sup>T</sup>    | 98.5                                  | n/a                      | n/a      | n/a                      |
| <i>Kluyvera intermedia</i> NBRC 102594 <sup>T</sup>      | 98.5                                  | n/a                      | n/a      | n/a                      |
| <i>Enterobacter bugandensis</i> EB-247 <sup>T</sup>      | 98.5                                  | n/a                      | n/a      | n/a                      |
| <i>Lelliottia aquatilis</i> 6331-17 <sup>T</sup>         | 98.5                                  | n/a                      | n/a      | n/a                      |
| <i>Enterobacter sichuanensis</i> WCHEC11597 <sup>T</sup> | 98.5                                  | n/a                      | n/a      | n/a                      |

|                                                           |      |     |     |     |
|-----------------------------------------------------------|------|-----|-----|-----|
| <i>Lelliottia jeotgali</i> PFL01 <sup>T</sup>             | 98.4 | n/a | n/a | n/a |
| <i>Citrobacter braakii</i> ATCC 51113 <sup>T</sup>        | 98.4 | n/a | n/a | n/a |
| <i>Citrobacter portucalensis</i> A60 <sup>T</sup>         | 98.4 | n/a | n/a | n/a |
| <i>Citrobacter murlinae</i> CDC 2970-59 <sup>T</sup>      | 98.3 | n/a | n/a | n/a |
| <i>Kluyvera ascorbata</i> ATCC 33433 <sup>T</sup>         | 98.3 | n/a | n/a | n/a |
| <i>Buttiauxella warmboldiae</i> DSM 9404 <sup>T</sup>     | 98.3 | n/a | n/a | n/a |
| <i>Lelliottia nimipressuralis</i> LMG 10245 <sup>T</sup>  | 98.3 | n/a | n/a | n/a |
| <i>Buttiauxella brennerae</i> DSM 9396 <sup>T</sup>       | 98.2 | n/a | n/a | n/a |
| <i>Pseudescherichia vulneris</i> NBRC 102420 <sup>T</sup> | 98.2 | n/a | n/a | n/a |
| <i>Citrobacter pasteurii</i> CIP 55.13 <sup>T</sup>       | 98.2 | n/a | n/a | n/a |
| <i>Yokenella regensburgei</i> ATCC 49455 <sup>T</sup>     | 98.2 | n/a | n/a | n/a |
