# Supplementary material for: Scandinavium goeteborgense gen. nov., sp. nov., a New Member of the Family Enterobacteriaceae Isolated From a Wound Infection, Carries a Novel Quinolone Resistance Gene Variant
Source: PubMed Central journal article supplement (PMC6856666; doi:10.3389/fmicb.2019.02511), 2019-11-05
Supplement: Table_4.pdf [file Table_4.pdf]

**Table S4.** List of type species of the current genera of the family *Enterobacteriaceae* with validly published names. GenBank accession numbers for the genome sequences and the 16S rRNA gene sequences (if available) of the type strains of the type species are shown.

| <b>Type species</b>                            | <b>Type strain genome sequence accession number</b> | <b>Type strain 16S rRNA gene sequence accession number</b> |
|------------------------------------------------|-----------------------------------------------------|------------------------------------------------------------|
| <i>Biostraticola tofi</i>                      | SMCR00000000                                        | AM774412                                                   |
| <i>Buttiauxella agrestis</i>                   | JMPI00000000                                        | JMPI00000000                                               |
| <i>Cedecea davisae</i>                         | ATDT00000000                                        | ATDT00000000                                               |
| <i>Citrobacter freundii</i>                    | BBMV00000000                                        | BBMV00000000                                               |
| <i>Cronobacter sakazakii</i>                   | CP011047                                            | CP011047                                                   |
| <i>Enterobacillus tribolii</i>                 | QRAP00000000                                        | QRAP00000000                                               |
| <i>Enterobacter cloacae</i>                    | CP001918                                            | CP001918                                                   |
| <i>Escherichia coli</i>                        | AGSE00000000                                        | AGSE00000000                                               |
| <i>Franconibacter helveticus</i>               | AWFX00000000                                        | AXDK00000000                                               |
| <i>Gibbsiella quercinecans</i>                 | CP014136                                            | CP014136                                                   |
| <i>Izhakiella capsodis</i>                     | FOVC00000000                                        | KF436763                                                   |
| <i>Klebsiella pneumoniae</i>                   | JOOW00000000                                        | JOOW00000000                                               |
| <i>Kluyvera ascorbata</i>                      | JMPL00000000                                        | JMPL00000000                                               |
| <i>Kosakonia cowanii</i>                       | BBEU00000000                                        | BBEU00000000                                               |
| <i>Leclercia adecarboxylata</i>                | JMPM00000000                                        | BCNP00000000                                               |
| <i>Lelliottia nimipressuralis</i>              | SDDX00000000                                        | SDDX00000000                                               |
| <i>Mangrovibacter plantisponsor</i>            | QGTS00000000                                        | QGTS00000000                                               |
| <i>Metakosakonia massiliensis</i>              | CAEO00000000                                        | CAEO00000000                                               |
| <i>Phytobacter diazotrophicus</i>              | SMDE00000000                                        | KY288669                                                   |
| <i>Plesiomonas shigelloides</i>                | LT575468                                            | LT575468                                                   |
| <i>Pluralibacter gergoviae</i>                 | BCZS00000000                                        | UGTG00000000                                               |
| <i>Pseudoescherichia vulneris</i>              | BBMZ00000000                                        | BBMZ00000000                                               |
| <i>Pseudocitrobacter faecalis</i>              | QNRL00000000                                        | QNRL00000000                                               |
| <i>Raoultella planticola</i>                   | JMPP00000000                                        | JMPP00000000                                               |
| <i>Rosenbergiella nectarea</i>                 | FOGC00000000                                        | FOGC00000000                                               |
| <i>Saccharobacter fermentatus</i> <sup>a</sup> | ---                                                 | ---                                                        |
| <i>Salmonella enterica</i>                     | CP019186                                            | CP019186                                                   |
| <i>Shigella dysenteriae</i>                    | CP026774                                            | CP026774                                                   |
| <i>Shimwellia pseudoproteus</i>                | ---                                                 | FJ267523                                                   |
| <i>Siccibacter turicensis</i>                  | AWFZ00000000                                        | AVPP00000000                                               |
| <i>Trabulsiella guamensis</i>                  | JMTB00000000                                        | JMTB00000000                                               |
| <i>Yokenella regensburgei</i>                  | JMPS00000000                                        | JMPS00000000                                               |

<sup>a</sup> Type strain not available at any recognized culture collection.
